# Supplementary material for: Activated PI3K delta syndrome 1 mutations cause neutrophilia in zebrafish larvae
Source: PubMed Central journal article supplement (PMC10655814; doi:10.1242/dmm.049841), 2023-03-13
Supplement: dmm-16-049841-s1.pdf [file dmm-16-049841-s1.pdf]

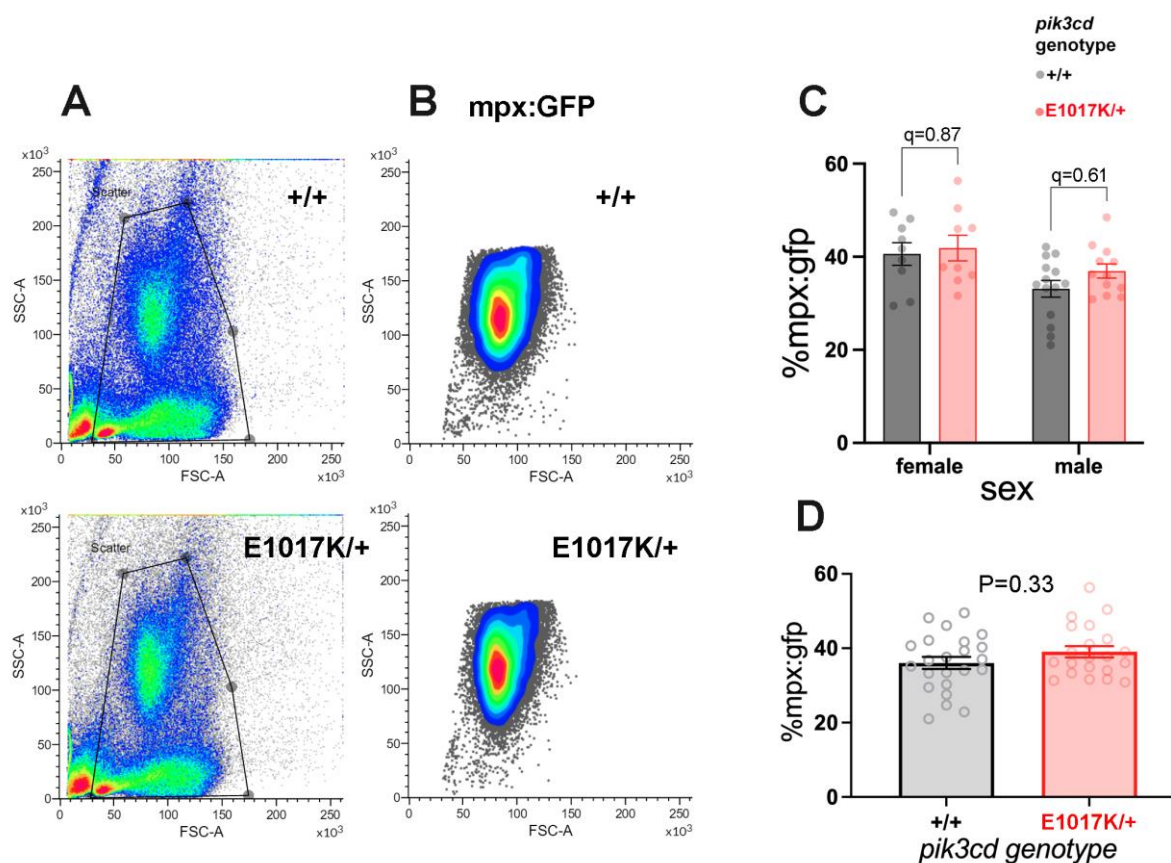

**Fig. S1. Whole kidney marrow flow cytometry assessment of neutrophils in *pik3cd*<sup>E1017K/+</sup> adults.** (A) Density plots of forward scatter and side scatter sorted whole kidney marrow from individual, eight month old, *TgBAC(mpx:gfp)i114; pik3cd*<sup>E1017K/+</sup> and *TgBAC(mpx:gfp)i114; pik3cd*<sup>+/+</sup> zebrafish. Gates are marked for the cell population analysed. (B) Density plots of GFP fluorescent viable cells from the cell population gated in (A). (C) Chart showing proportion of leukocyte and precursor cells as selected in (A) that are *TgBAC(mpx:gfp)i114* positive (as in (B)) from 21 *TgBAC(mpx:gfp)i114; pik3cd*<sup>E1017K/+</sup> and 23 *TgBAC(mpx:gfp)i114; pik3cd*<sup>+/+</sup> zebrafish, of the same age, raised together from the same clutches. Comparisons are shown for females and for males. Bars show the mean±SEM, Multiple Mann-Whitney tests. Single experiment. (D) The same data as in (C) but not segregated by sex. Bars show the mean±SEM, Mann-Whitney test.
